# Supplementary material for: Venue-Based Networks May Underpin HCV Transmissions amongst HIV-Infected Gay and Bisexual Men
Source: PubMed Central journal article supplement (PMC5008823; doi:10.1371/journal.pone.0162002), 2016-09-01

**Supplementary Information S1. Potential mechanisms for entry into study through (A) clinical hepatitis definition or (B) antibody seroconversion definition**

Where **X** represents examples of clinical hepatitis in scenario A and antibody negative/antibody positive in scenario B

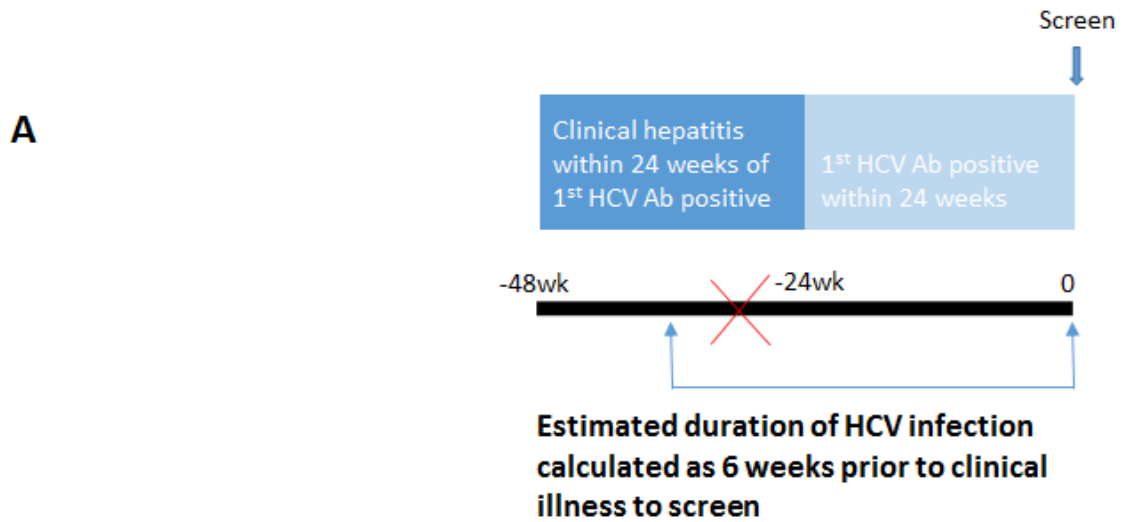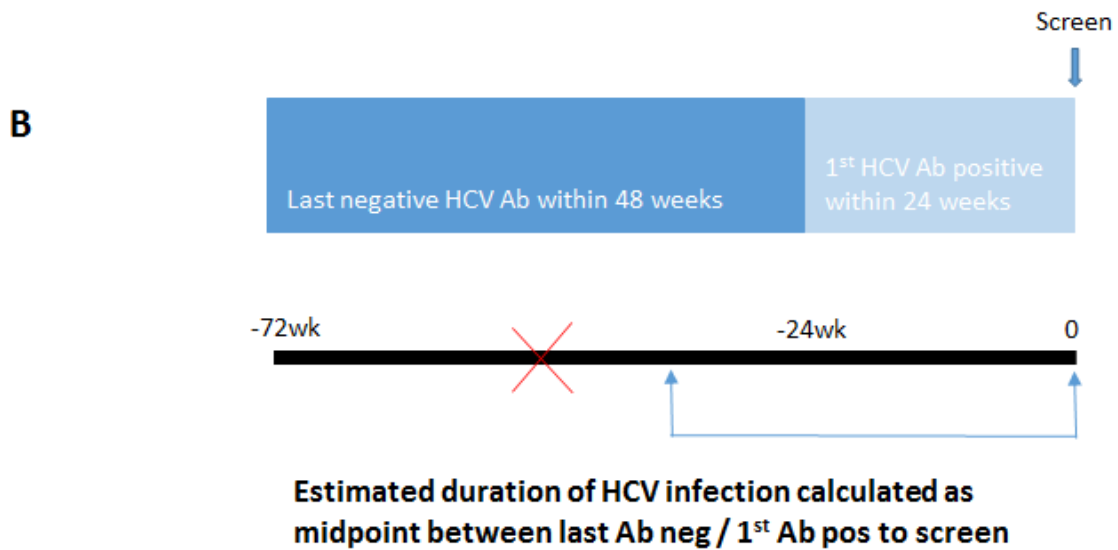

Supplement: pone.0162002.s001.pdf [file pone.0162002.s001.pdf]
