# Supplementary material for: Venue-Based Networks May Underpin HCV Transmissions amongst HIV-Infected Gay and Bisexual Men
Source: PubMed Central journal article supplement (PMC5008823; doi:10.1371/journal.pone.0162002), 2016-09-01
Supplement: pone.0162002.s002.pdf [file pone.0162002.s002.pdf]

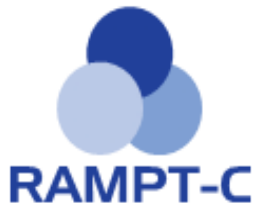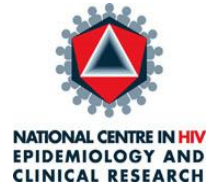

## **Defining risk and mechanisms of permucosal transmission for acute HCV infection within high-risk populations**

### **COMPLETION INSTRUCTIONS**

- Ensure the patient information sheet and consent form has been correctly completed
- Ensure the visit date, study identifier are completed on each page of this form
- Complete all questions (unless otherwise specified)
- Except where specified, all questions are single response only
- Please write legibly
- All text and explanatory comments should be brief
- If the answer is zero, do not leave the field blank write '0'
- If the answer to the question is unknown, write 'not known' or 'NK'
- If a question is not applicable, write 'not applicable' or 'NA'
- Date format is dd/mm/yyyy
- If a date is partially known, enter that part of the date known and 'NK' for that not known part e.g. NK / 04 / 08
- When making a correction, draw a single line through the text to be changed so that the original entry is still legible. Initial and date the correction
- DO NOT use correction fluid or write over information as this will invalidate the data and create query

**Study Schema**

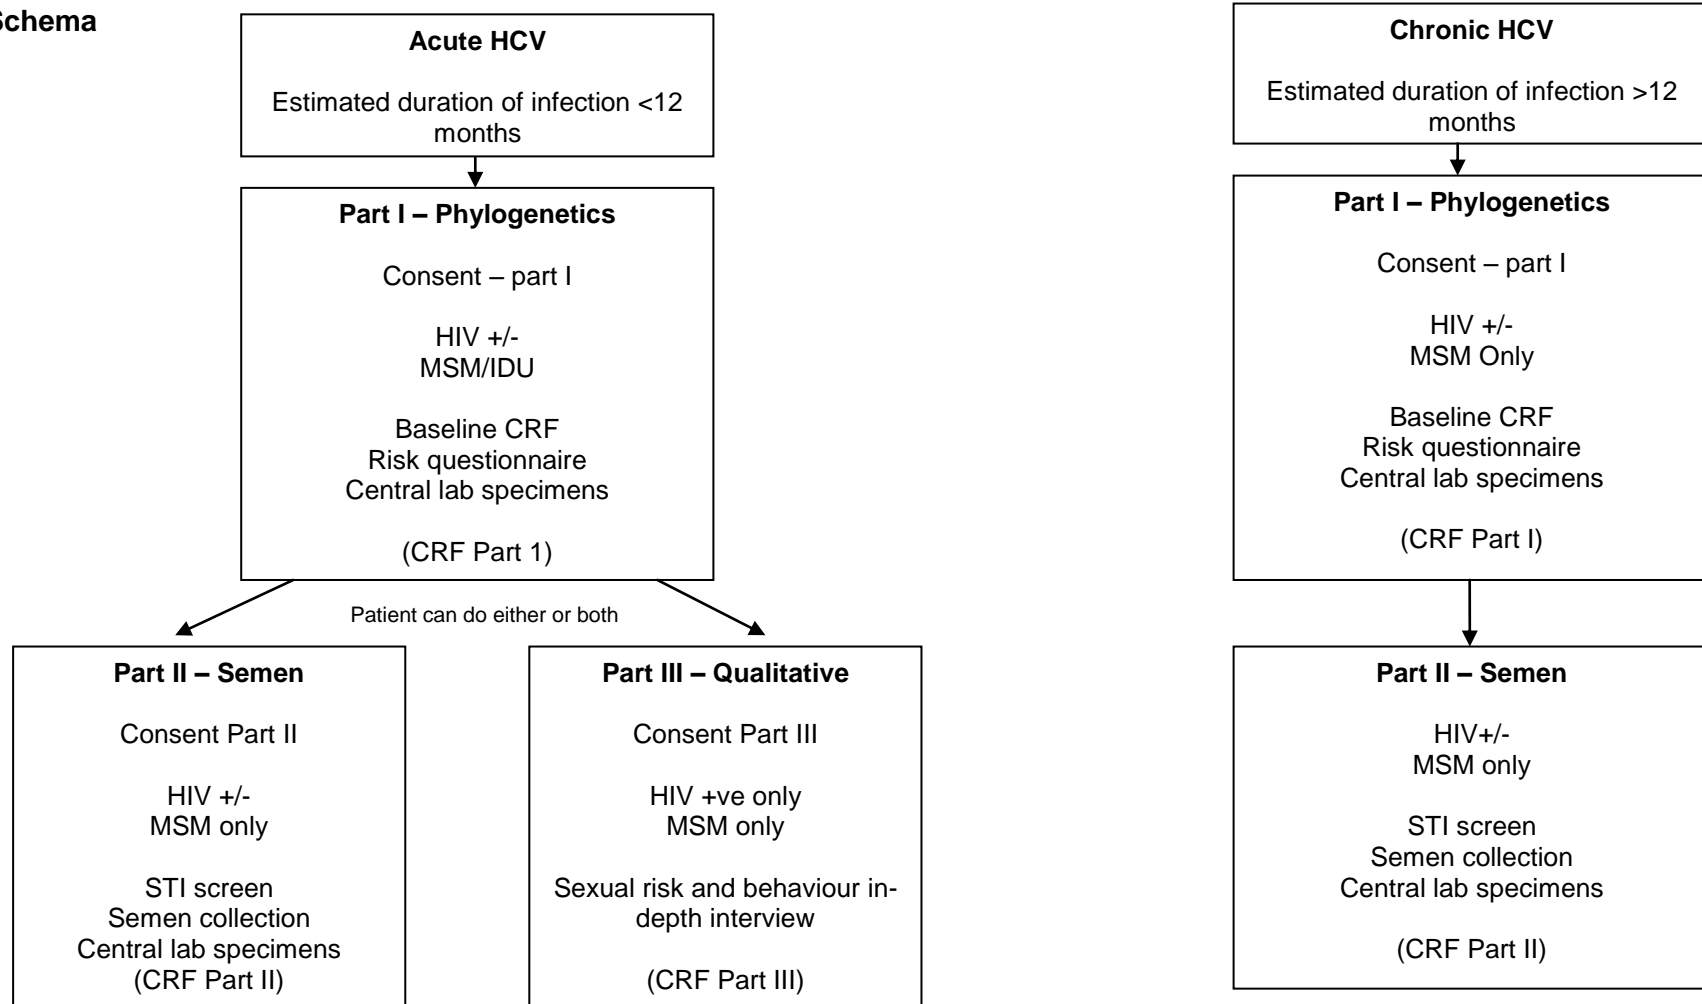

### Schedule of Assessment – Baseline Visit

| Schedule of Assessment                                                                                        | Part I only | Part I & II | Part I & III | Part I, II & III |
|---------------------------------------------------------------------------------------------------------------|-------------|-------------|--------------|------------------|
| Written Informed Consent                                                                                      | X           | X           | X            | X                |
| Central Lab – AMR<br>Stored Study Plasma Sample                                                               | X           | X           | X            | X                |
| Local Lab – standard of care                                                                                  |             |             |              |                  |
| • Anti-HCV antibody                                                                                           | X           | X           | X            | X                |
| • HCV RNA quantitative                                                                                        | X           | X           | X            | X                |
| • HCV genotype                                                                                                |             |             |              |                  |
| • BBV serology (HBsAG, HIV Ab)                                                                                | X           | X           | X            | X                |
| • HIV RNA & T-cell subsets <sup>a</sup>                                                                       | X           | X           | X            | X                |
| • SOC – LFT, platelets                                                                                        | X           | X           | X            | X                |
| Baseline Interview (includes Incident case interview & Sexual behavior and practices interview <sup>b</sup> ) | X           | X           | X            | X                |
| Central Lab – AMR<br>Stored Study Plasma Sample<br>Stored Semen Sample                                        |             | X<br>X      |              | X<br>X           |
| Local Lab – STI Screen                                                                                        |             |             |              |                  |
| • Syphilis serology - SST tube                                                                                |             | X           |              | X                |
| • Chlamydia, Gonorrhea, LGV - Urine, throat & rectal swabs                                                    |             | X           |              | X                |
| • HSV swab <sup>c</sup>                                                                                       |             | X           |              | X                |
| • HAV serology - SST tube                                                                                     |             | X           |              | X                |
| Behavioural Mechanisms Interview                                                                              |             |             | X            | X                |

<sup>a</sup> If HIV serology positive <sup>b</sup> Complete by acute MSM patients only <sup>c</sup> Perform in the presence of ulcerative lesions only

| RAMPT-C                                  |  | BASELINE VISIT                                          |  |
|------------------------------------------|--|---------------------------------------------------------|--|
| Visit date<br>□□/□□/□□□□<br>(dd/mm/yyyy) |  | Study number<br>0902-□□□□□□-□□                          |  |
|                                          |  | Patient initials<br>□□□□<br>E.g. <u>Smith</u> John SMJO |  |

### INCLUSION & EXCLUSION CRITERIA CHECKLISTS

## Part I – Phylogenetics Component – ALL PATIENTS

### All patients

#### Inclusion Criteria:

a) Is the male patient  $\geq$  16 years of age?

Yes

No

b) Has the patient provided written informed consent?

Yes

No

c) Is the patient HCV RNA positive?

Yes

No

d) Does the patient have a first positive HCV antibody or HCV RNA positive within the previous 6 months and documented HCV antibody negative or HCV RNA negative within the 12 months?  
OR

Does the patient have a first positive HCV antibody or HCV RNA positive within the previous 6 months and documented acute clinical hepatitis (jaundice or ALT > 10x ULN)

Yes

No

e) Does the patient have adequate English to provide written, informed consent and to provide reliable responses to the study interview?

Yes

No

|                                                                                                |
|------------------------------------------------------------------------------------------------|
| If any no box have been ticked the patient is <b>not eligible</b> to enter Part I of the Study |
|------------------------------------------------------------------------------------------------|

#### Exclusion criteria

a) Does the investigator consider the patient to be unlikely to participate in follow-up and/or unwilling to provide extra blood samples?

Yes

No

|                                                                                                 |
|-------------------------------------------------------------------------------------------------|
| If the yes box have been ticked the patient is <b>not eligible</b> to enter Part I of the Study |
|-------------------------------------------------------------------------------------------------|

| RAMPT-C                                                                                                                                                         |                                                                                                                                                                                                               | BASELINE VISIT                                                                                                                         |
|-----------------------------------------------------------------------------------------------------------------------------------------------------------------|---------------------------------------------------------------------------------------------------------------------------------------------------------------------------------------------------------------|----------------------------------------------------------------------------------------------------------------------------------------|
| Visit date<br><input type="text"/> / <input type="text"/> / <input type="text"/> <input type="text"/> <input type="text"/> <input type="text"/><br>(dd/mm/yyyy) | Study number<br><b>0902-</b> <input type="text"/> <input type="text"/> <input type="text"/> <input type="text"/> <input type="text"/> <input type="text"/> <b>-</b> <input type="text"/> <input type="text"/> | Patient initials<br><input type="text"/> <input type="text"/> <input type="text"/> <input type="text"/><br>E.g. <u>Smith</u> John SMJO |

## PART II – Semen Component

**N/A**  (please tick the box if patient is not enrolled into this Component)

### Inclusion Criteria:

a) Is the male patient  $\geq$  16 years of age?

Yes

No

b) Has the patient provided written informed consent?

Yes

No

c) Is the patient HCV RNA positive?

Yes

No

d) Does the patient have a first positive HCV antibody or HCV RNA positive within the previous 6 months and documented HCV antibody negative or HCV RNA negative within the 12 months?  
OR

Does the patient have a first positive HCV antibody or HCV RNA positive within the previous 6 months and documented acute clinical hepatitis (jaundice or ALT > 10x ULN)  
OR

Has the patient been HCV RNA positive > 12 months (Chronic HCV)?

Yes

No

e) Does the patient have adequate English to provide written, informed consent and to provide reliable responses to the study interview?

Yes

No

|                                                                                                 |
|-------------------------------------------------------------------------------------------------|
| If any no box have been ticked the patient is <b>not eligible</b> to enter Part II of the Study |
|-------------------------------------------------------------------------------------------------|

### Exclusion criteria:

a) Does the investigator consider the patient to be unlikely to participate in follow-up and/or unwilling to provide extra blood samples?

Yes

No

b) Is the patient currently on HCV treatment or had prior HCV treatment?

Yes

No

|                                                                                                  |
|--------------------------------------------------------------------------------------------------|
| If any yes box have been ticked the patient is <b>not eligible</b> to enter Part II of the Study |
|--------------------------------------------------------------------------------------------------|

| RAMPT-C                                                                                                                                                         | BASELINE VISIT                                                                                                                                                                                  |                                                                                                                                        |
|-----------------------------------------------------------------------------------------------------------------------------------------------------------------|-------------------------------------------------------------------------------------------------------------------------------------------------------------------------------------------------|----------------------------------------------------------------------------------------------------------------------------------------|
| Visit date<br><input type="text"/> / <input type="text"/> / <input type="text"/> <input type="text"/> <input type="text"/> <input type="text"/><br>(dd/mm/yyyy) | Study number<br>0902- <input type="text"/> <input type="text"/> <input type="text"/> <input type="text"/> <input type="text"/> <input type="text"/> - <input type="text"/> <input type="text"/> | Patient initials<br><input type="text"/> <input type="text"/> <input type="text"/> <input type="text"/><br>E.g. <u>Smith</u> John SMJO |

## PART III – Behavioural Interview Component

**N/A**  (please tick the box if patient is not enrolled into this Component)

### Inclusion Criteria:

a) Is the male patient  $\geq$  16 years of age?

Yes

No

b) Does the patient identify as MSM?

Yes

No

c) Is the patient co-infected with HIV?

Yes

No

d) Is the patient HCV RNA positive?

Yes

No

e) Does the patient have a first positive HCV antibody or HCV RNA positive within the previous 6 months and documented HCV antibody negative or HCV RNA negative within the 12 months?  
OR

Does the patient has a first positive HCV antibody or HCV RNA positive within the previous 6 months and documented acute clinical hepatitis (jaundice or ALT > 10x ULN)

Yes

No

f) Does the patient have adequate English to provide written, informed consent and to provide reliable responses to the study interview?

Yes

No

|                                                                                                  |
|--------------------------------------------------------------------------------------------------|
| If any no box have been ticked the patient is <b>not eligible</b> to enter Part III of the Study |
|--------------------------------------------------------------------------------------------------|

### Exclusion criteria

a) Does the investigator consider the patient to be unlikely to participate in follow-up and/or unwilling to provide extra blood samples?

Yes

No

|                                                                                                  |
|--------------------------------------------------------------------------------------------------|
| If the yes box has been ticked the patient is <b>not eligible</b> to enter Part III of the Study |
|--------------------------------------------------------------------------------------------------|

| <b>RAMPT-C</b>                                                                                                                                                                                                                                                 | <b>BASELINE VISIT</b>                                                                                                                                                                                                                               |                                                                                                                                                                         |
|----------------------------------------------------------------------------------------------------------------------------------------------------------------------------------------------------------------------------------------------------------------|-----------------------------------------------------------------------------------------------------------------------------------------------------------------------------------------------------------------------------------------------------|-------------------------------------------------------------------------------------------------------------------------------------------------------------------------|
| Visit date<br><div style="text-align: center; margin: 5px 0;"> <input type="text"/> <input type="text"/> / <input type="text"/> <input type="text"/> / <input type="text"/> <input type="text"/> <input type="text"/> <input type="text"/> </div> (dd/mm/yyyy) | Study number<br><div style="font-size: 1.2em; margin: 5px 0;">0902-</div> <input type="text"/> <input type="text"/> <input type="text"/> <input type="text"/> <input type="text"/> <input type="text"/> - <input type="text"/> <input type="text"/> | Patient initials<br><div style="margin: 5px 0;"> <input type="text"/> <input type="text"/> <input type="text"/> <input type="text"/> </div> E.g. <u>Smith</u> John SMJO |

**Interviewer's Name:** \_\_\_\_\_

## PART I – Phylogenetics Component (All patients)

| Has subject been enrolled into the following cohort? | Yes                      | No                       |
|------------------------------------------------------|--------------------------|--------------------------|
| HITS-i                                               | <input type="checkbox"/> | <input type="checkbox"/> |
| ATAHC                                                | <input type="checkbox"/> | <input type="checkbox"/> |
| pH                                                   | <input type="checkbox"/> | <input type="checkbox"/> |
| HIM                                                  | <input type="checkbox"/> | <input type="checkbox"/> |

### HEPATITIS C DIAGNOSIS

1. Date first documented to be HCV antibody positive \_\_\_\_/\_\_\_\_/\_\_\_\_  
dd/mm/yyyy  

not positive
2. Date first documented to be HCV RNA positive \_\_\_\_/\_\_\_\_/\_\_\_\_  
dd/mm/yyyy
3. Date of most recent negative HCV antibody test \_\_\_\_/\_\_\_\_/\_\_\_\_  
dd/mm/yyyy  
 (Tick N/A  if patient is chronic HCV)  

Never done  
 No record of result
4. Documented HCV seroconversion illness?  
 (Tick N/A  if patient is chronic HCV)
  - 4a. If yes, which of the following symptoms have been experienced?
 

|                 | Yes                      | No                       | Unclear/specify                |
|-----------------|--------------------------|--------------------------|--------------------------------|
| Jaundice        | <input type="checkbox"/> | <input type="checkbox"/> | <input type="checkbox"/> _____ |
| Nausea/vomiting | <input type="checkbox"/> | <input type="checkbox"/> | <input type="checkbox"/> _____ |
| Abdominal pain  | <input type="checkbox"/> | <input type="checkbox"/> | <input type="checkbox"/> _____ |
| Fever           | <input type="checkbox"/> | <input type="checkbox"/> | <input type="checkbox"/> _____ |
  - 4b. Date of initial onset of symptoms \_\_\_\_/\_\_\_\_/\_\_\_\_  
dd/mm/yyyy

| RAMPT-C                                                                                                                                                                                                   |  | BASELINE VISIT                                                                                                                                                                                                |  |
|-----------------------------------------------------------------------------------------------------------------------------------------------------------------------------------------------------------|--|---------------------------------------------------------------------------------------------------------------------------------------------------------------------------------------------------------------|--|
| Visit date<br><input type="text"/> <input type="text"/> / <input type="text"/> <input type="text"/> / <input type="text"/> <input type="text"/> <input type="text"/> <input type="text"/><br>(dd/mm/yyyy) |  | Study number<br><b>0902-</b> <input type="text"/> <input type="text"/> <input type="text"/> <input type="text"/> <input type="text"/> <input type="text"/> <b>-</b> <input type="text"/> <input type="text"/> |  |
|                                                                                                                                                                                                           |  | Patient initials<br><input type="text"/> <input type="text"/> <input type="text"/> <input type="text"/><br>E.g. <u>Smith</u> John SMJO                                                                        |  |

|                                  |                          |                          |
|----------------------------------|--------------------------|--------------------------|
| 5. Consent form signed           | _____<br>dd/mm/yyyy      |                          |
| Components                       | Yes                      | No                       |
| Phylogenetics Study (Part I)     | <input type="checkbox"/> | <input type="checkbox"/> |
| Semen Study (Part II)            | <input type="checkbox"/> | <input type="checkbox"/> |
| Behavioural Interview (Part III) | <input type="checkbox"/> | <input type="checkbox"/> |



| <b>RAMPT-C</b>                                                                                                                                                  | <b>BASELINE VISIT</b>                                                                                                                   |                                                                                                                                                                                |
|-----------------------------------------------------------------------------------------------------------------------------------------------------------------|-----------------------------------------------------------------------------------------------------------------------------------------|--------------------------------------------------------------------------------------------------------------------------------------------------------------------------------|
| Visit date<br><div style="text-align: center; font-family: monospace; font-size: 1.2em;">             □□/□□/□□□□<br/>             (dd/mm/yyyy)           </div> | Study number<br><div style="text-align: center; font-family: monospace; font-size: 1.2em;">             0902-□□□□□□-□□           </div> | Patient initials<br><div style="text-align: center; font-family: monospace; font-size: 1.2em;">             □□□□<br/>             E.g. <u>Smith</u> John SMJO           </div> |

### VIROLOGICAL SCREENING

6. HCV Antibody Sample collection date    /   /     
dd/mm/yyyy

6a. HCV Antibody result     Positive     Negative     Equivocal     Not done

  

7. HCV RNA - Quantitative Sample collection date    /   /     
dd/mm/yyyy

7a. HCV RNA \_\_\_\_\_  copies/ml     IU/ml

  

8. HCV Genotype Sample collection date    /   /     
dd/mm/yyyy

8a. Genotype \_\_\_\_\_ Subtype \_\_\_\_\_

  

9. HIV Antibody Sample collection date    /   /     
dd/mm/yyyy

9a. Anti-HIV result     Positive     Negative     Equivocal     Not done

  

10. HIV-1 RNA/CD4/CD8 Sample collection date    /   /     Not required  
dd/mm/yyyy

10a. HIV RNA \_\_\_\_\_  copies/ml     N/A

10b. CD4 total \_\_\_\_\_  cells/mm<sup>3</sup>    CD8 total \_\_\_\_\_  cells/mm<sup>3</sup>     N/A

  

11. Hepatitis B Serology Sample collection date    /   /     
dd/mm/yyyy

11a. HBsAg     Positive     Negative     Equivocal     Not done

| <b>RAMPT-C</b>                                                                                                                                 | <b>BASELINE VISIT</b>                                                                                                                   |                                                                                                                                                               |
|------------------------------------------------------------------------------------------------------------------------------------------------|-----------------------------------------------------------------------------------------------------------------------------------------|---------------------------------------------------------------------------------------------------------------------------------------------------------------|
| Visit date<br><div style="text-align: center; font-family: monospace; font-size: 1.2em;">             □□/□□/□□□□           </div> (dd/mm/yyyy) | Study number<br><div style="text-align: center; font-family: monospace; font-size: 1.2em;">             0902-□□□□□□-□□           </div> | Patient initials<br><div style="text-align: center; font-family: monospace; font-size: 1.2em;">             □□□□           </div> E.g. <u>Smith</u> John SMJO |

12. SOC Bloods

Sample collection date    /   /     
dd/mm/yyyy

| Liver Function Test  | Result | Unit |
|----------------------|--------|------|
| Albumin              |        | g/L  |
| Total bilirubin      |        | U/L  |
| ALT                  |        | U/L  |
| AST                  |        | U/L  |
| Alkaline phosphatase |        | U/L  |
| GGT                  |        | U/L  |

| Full Blood Count | Result | Unit (please tick box) |
|------------------|--------|------------------------|
| Platelets        |        | 10 <sup>9</sup> /L     |

**CENTRAL LABORATORY COLLECTION**

|                                                                                                                                                                |                          |                          |          |
|----------------------------------------------------------------------------------------------------------------------------------------------------------------|--------------------------|--------------------------|----------|
| 13. Sample collection date <u>   </u> / <u>   </u> / <u>   </u><br><div style="text-align: center; font-family: monospace; font-size: 0.8em;">dd/mm/yyyy</div> |                          |                          |          |
| Collected                                                                                                                                                      | Yes                      | No                       | Comments |
| Stored Plasma                                                                                                                                                  | <input type="checkbox"/> | <input type="checkbox"/> | _____    |

| <b>RAMPT-C</b>                                                                                                                                                                                                                                                 | <b>BASELINE VISIT</b>                                                                                                                                                                                                                               |                                                                                                                                                                         |
|----------------------------------------------------------------------------------------------------------------------------------------------------------------------------------------------------------------------------------------------------------------|-----------------------------------------------------------------------------------------------------------------------------------------------------------------------------------------------------------------------------------------------------|-------------------------------------------------------------------------------------------------------------------------------------------------------------------------|
| Visit date<br><div style="text-align: center; margin: 5px 0;"> <input type="text"/> <input type="text"/> / <input type="text"/> <input type="text"/> / <input type="text"/> <input type="text"/> <input type="text"/> <input type="text"/> </div> (dd/mm/yyyy) | Study number<br><div style="font-size: 1.2em; margin: 5px 0;">0902-</div> <input type="text"/> <input type="text"/> <input type="text"/> <input type="text"/> <input type="text"/> <input type="text"/> - <input type="text"/> <input type="text"/> | Patient initials<br><div style="margin: 5px 0;"> <input type="text"/> <input type="text"/> <input type="text"/> <input type="text"/> </div> E.g. <u>Smith</u> John SMJO |

**DEMOGRAPHICS**

*I'd like to ask you a few questions about yourself*

14. Do you consider yourself to be male, female or transgender?

- Male ..... 1
- Female ..... 2
- Transgender ..... 3
- Not stated/inadequately described ..... 9

15. Do you identify as?

- Heterosexual/Straight ..... 1
- Bisexual ..... 2
- Gay/Lesbian ..... 3

16. What is your year of birth?

(yyyy)

17. Are you of Aboriginal or Torres Strait Islander origin?

- No response ..... 1
- Non-indigenous ..... 2
- Aboriginal ..... 3
- Torres Strait Islander ..... 4
- Both Aboriginal and Torres Strait Islander ..... 5
- Indigenous non-specified ..... 6

18. What is the main language you speak at home?

- English ..... 1
- Other ..... 2
- (Specify .....)

19. What is your country of birth?

.....

| RAMPT-C                                                                                                                                                                                                   |  | BASELINE VISIT                                                                                                                                                                                  |  |
|-----------------------------------------------------------------------------------------------------------------------------------------------------------------------------------------------------------|--|-------------------------------------------------------------------------------------------------------------------------------------------------------------------------------------------------|--|
| Visit date<br><input type="text"/> <input type="text"/> / <input type="text"/> <input type="text"/> / <input type="text"/> <input type="text"/> <input type="text"/> <input type="text"/><br>(dd/mm/yyyy) |  | Study number<br>0902- <input type="text"/> <input type="text"/> <input type="text"/> <input type="text"/> <input type="text"/> <input type="text"/> - <input type="text"/> <input type="text"/> |  |
|                                                                                                                                                                                                           |  | Patient initials<br><input type="text"/> <input type="text"/> <input type="text"/> <input type="text"/><br>E.g. <u>Smith</u> John SMJO                                                          |  |

20. If not Australian born, in what year did you first come to Australia?

.....

21. Have you ever been in prison/ Juvenile justice centre?

Yes ..... 1  
 No..... 2

22. If yes, have you been in prison or juvenile justice centre within the last 2 years?

Yes ..... 1  
 No..... 2

### DRUG USAGE AND INJECTING BEHAVIOURS

*We now need to ask you some questions about your drug use – when you first used drugs and how often and how you use drugs and alcohol now. I'll also be asking you about practices such as sharing needles and syringes and other injecting equipment. One of the aims of this study is to examine how people become infected with hepatitis C. Remember all of this information is confidential. Your answers will not affect the treatment you receive.*

23. Have you ever injected any drug?

No..... 0 (If no, go to Question 27)  
 Yes ..... 1 (If yes, go to Question 24)

24. How old were you when you first injected any drug?

.....years

25. When was the last time you injected?

Within the last month ..... 1  
 Between 1 and 6 months ago ..... 2  
 Between 6 and 12 months ago ..... 3 (go to question 27)  
 Between 1-2 years ago ..... 4 (go to question 27)  
 More than 2 years ago ..... 5 (go to question 27)

| <b>RAMPT-C</b>                                                                                                                                                                                                                                                                            | <b>BASELINE VISIT</b>                                                                                                                                                                                                                                                                                                                      |                                                                                                                                                                                                                        |
|-------------------------------------------------------------------------------------------------------------------------------------------------------------------------------------------------------------------------------------------------------------------------------------------|--------------------------------------------------------------------------------------------------------------------------------------------------------------------------------------------------------------------------------------------------------------------------------------------------------------------------------------------|------------------------------------------------------------------------------------------------------------------------------------------------------------------------------------------------------------------------|
| Visit date<br><div style="text-align: center; font-family: monospace; font-size: 1.2em;"> <input type="text"/> <input type="text"/> / <input type="text"/> <input type="text"/> / <input type="text"/> <input type="text"/> <input type="text"/> <input type="text"/> </div> (dd/mm/yyyy) | Study number<br><div style="text-align: center; font-family: monospace; font-size: 1.2em;"> <b>0902-</b> <input type="text"/> <b>-</b> <input type="text"/> <input type="text"/> </div> | Patient initials<br><div style="text-align: center; font-family: monospace; font-size: 1.2em;"> <input type="text"/> <input type="text"/> <input type="text"/> <input type="text"/> </div> E.g. <u>Smith</u> John SMJO |

26. If you injected in the last 6 months, how often did you inject?

- More than three times most days..... 1
- 2-3 times most days..... 2
- Once a day ..... 3
- More than weekly, not daily (uses between 1-6 days per week)..... 4
- Less than weekly ..... 5
- Have not injected in the last 6 months ..... 6

27. What do you consider the most likely way and other possible ways in which you became infected with hepatitis C?

- |          | Most likely way<br>(Circle one response only)                        | Other possible ways<br>(circle all that apply) |
|----------|----------------------------------------------------------------------|------------------------------------------------|
| 1 .....  | Injecting drug use                                                   | .....1                                         |
| 2 .....  | Transfusion of blood products                                        | .....2                                         |
| 3 .....  | Occupational (needle stick or other exposure)                        | .....3                                         |
| 4.....   | Sexual exposure to a known HCV positive person of the same sex       | .....4                                         |
| 5 .....  | Sexual exposure to a known HCV positive person of the opposite sex   | .....5                                         |
| 6.....   | Sexual exposure to persons of unknown HCV status of the same sex     | .....6                                         |
| 7 .....  | Sexual exposure to persons of unknown HCV status of the opposite sex | .....7                                         |
| 8 .....  | Body piercing                                                        | .....8                                         |
| 9 .....  | Tattoos                                                              | .....9                                         |
| 10 ..... | Use of other recreational drugs (snorting/inhaling)                  | .....10                                        |
| 11 ..... | Other, specify                                                       | .....11                                        |
| (.....)  |                                                                      | (.....)                                        |

28. Have you injected in the last month?

- No..... 0 (If no, go to question 31)
- Yes ..... 1

29. How often did you use a NEW sterile needle and syringe last month?

| <b>RAMPT-C</b>                                                                                                                                                                                                                                                                            | <b>BASELINE VISIT</b>                                                                                                                                                                                                                                             |                                                                                                                                                                                                 |
|-------------------------------------------------------------------------------------------------------------------------------------------------------------------------------------------------------------------------------------------------------------------------------------------|-------------------------------------------------------------------------------------------------------------------------------------------------------------------------------------------------------------------------------------------------------------------|-------------------------------------------------------------------------------------------------------------------------------------------------------------------------------------------------|
| Visit date<br><div style="text-align: center; font-family: monospace; font-size: 1.2em;"> <input type="text"/> <input type="text"/> / <input type="text"/> <input type="text"/> / <input type="text"/> <input type="text"/> <input type="text"/> <input type="text"/> </div> (dd/mm/yyyy) | Study number<br><div style="font-size: 1.5em; font-family: monospace;">             0902-<input type="text"/><input type="text"/><input type="text"/><input type="text"/><input type="text"/><input type="text"/>-<input type="text"/><input type="text"/> </div> | Patient initials<br><div style="font-family: monospace; font-size: 1.2em;"> <input type="text"/><input type="text"/><input type="text"/><input type="text"/> </div> E.g. <u>Smith</u> John SMJO |

- All injections..... 1
- Most of the time ..... 2
- Half of the time ..... 3
- Some of the time ..... 4
- Not in the last month..... 5

30. How many times in the last month have you used a needle and/ or syringe after someone else had already used it?

- None..... 0
- One time..... 1
- Two times ..... 2
- 3-5 times..... 3
- 6-10 times..... 4
- More than 10 times..... 5

31. What was the *last drug* you ever injected and the drug you injected *most often* in last 6 months?

| <b>LAST DRUG</b>              | <b>MOST OFTEN LAST 6 MONTHS</b> |
|-------------------------------|---------------------------------|
| 1 ..... Heroin.....           | 1                               |
| 2 ..... Methadone .....       | 2                               |
| 3 ..... Other opiates.....    | 3                               |
| 4 ..... Methamphetamine.....  | 4                               |
| 5 ..... Amphetamine .....     | 5                               |
| 6 ..... Cocaine .....         | 6                               |
| 7 ..... Cocaine +heroin ..... | 7                               |
| 8 ..... Benzodiazepines ..... | 8                               |
| 9 ..... Buprenorphine.....    | 9                               |
| 10 ..... Other (specify)..... | 10                              |
| (.....)                       | (.....)                         |
| Never injected.....           | 99                              |

|                                                                                     |                          |                          |         |
|-------------------------------------------------------------------------------------|--------------------------|--------------------------|---------|
| 32. In the last six months have you taken drugs in other ways other than injecting? |                          |                          |         |
|                                                                                     | Yes                      | No                       | Times   |
| Nasally                                                                             | <input type="checkbox"/> | <input type="checkbox"/> | (.....) |
| Other (specify)                                                                     | <input type="checkbox"/> | <input type="checkbox"/> | (.....) |

|                                          |                                        |                                                         |
|------------------------------------------|----------------------------------------|---------------------------------------------------------|
| <b>RAMPT-C</b>                           | <b>BASELINE VISIT</b>                  |                                                         |
| Visit date<br>□□/□□/□□□□<br>(dd/mm/yyyy) | Study number<br><b>0902-</b> □□□□□□-□□ | Patient initials<br>□□□□<br>E.g. <u>Smith</u> John SMJO |

**TO BE COMPLETED BY ACUTE HCV MSM ONLY**

**SEXUAL BEHAVIOUR AND PRACTICES**

*These questions are about your sexual practices over the last six months. You will be asked about your sexual practices including information about number of partners, HIV status and specific practices that could contribute to sexual transmission of HCV. Remember all of this information is confidential. Your answers will not affect the treatment you receive.*

33. In the past six months, how many different men have you had sex with?
- None..... 0  
 One ..... 1  
 2-5 men ..... 2  
 6-10 men ..... 3  
 11-50 men ..... 4  
 More than 50 men..... 5
34. In the past six months, how many men of the men you had sex with were men whose HIV status you did not know?
- .....men
35. In the past six months, how many of the men had sex with were men you knew were HIV positive?
- .....men
36. In the past six months, how many of the men you had sex with, were men you knew were HIV negative?
- .....men
37. In the past six months have you been involved in group sex (sex involving more than two individuals)? If so how many times?
- No..... 0  
 Yes ..... 1
- .....times

| <b>RAMPT-C</b>                                                                                                                                                  | <b>BASELINE VISIT</b>                                                                                                                   |                                                                                                                                                                                |
|-----------------------------------------------------------------------------------------------------------------------------------------------------------------|-----------------------------------------------------------------------------------------------------------------------------------------|--------------------------------------------------------------------------------------------------------------------------------------------------------------------------------|
| Visit date<br><div style="text-align: center; font-family: monospace; font-size: 1.2em;">             □□/□□/□□□□<br/>             (dd/mm/yyyy)           </div> | Study number<br><div style="text-align: center; font-family: monospace; font-size: 1.2em;">             0902-□□□□□□-□□           </div> | Patient initials<br><div style="text-align: center; font-family: monospace; font-size: 1.2em;">             □□□□<br/>             E.g. <u>Smith</u> John SMJO           </div> |

38. In the last six months how many men have you been involved with the following sexual practice?

| Sexual behaviour*                                 | Number of men whose HIV status you did not know | Number of men you knew were <b>HIV positive</b> | Number of men you knew were HIV-negative |
|---------------------------------------------------|-------------------------------------------------|-------------------------------------------------|------------------------------------------|
| •Oral sex – you sucked his cock                   |                                                 |                                                 |                                          |
| •Oral sex – he sucked your cock                   |                                                 |                                                 |                                          |
| •Anal sex – he fucked you with a condom           |                                                 |                                                 |                                          |
| •Anal sex – you fucked him with a condom          |                                                 |                                                 |                                          |
| •Anal sex – he fucked you without a condom        |                                                 |                                                 |                                          |
| •Anal sex – you fucked him without a condom       |                                                 |                                                 |                                          |
| •Fisting – you fisted him while wearing a glove   |                                                 |                                                 |                                          |
| •Fisting – you fisted him without wearing a glove |                                                 |                                                 |                                          |
| •Fisting – he fisted you while wearing a glove    |                                                 |                                                 |                                          |
| •Fisting – he fisted you without wearing a glove  |                                                 |                                                 |                                          |
| •S/M or bondage without blood                     |                                                 |                                                 |                                          |
| •S/M or bondage with blood                        |                                                 |                                                 |                                          |
| •Injected drugs before or during sex              |                                                 |                                                 |                                          |



| RAMPT-C                                  | BASELINE VISIT                         |                                                         |
|------------------------------------------|----------------------------------------|---------------------------------------------------------|
| Visit date<br>□□/□□/□□□□<br>(dd/mm/yyyy) | Study number<br><b>0902-</b> □□□□□□-□□ | Patient initials<br>□□□□<br>E.g. <u>Smith</u> John SMJO |

**Thank you for participating and answering these questions.**

**Do you have any comments you would like to make?**

**End of Part I**

| <b>RAMPT-C</b>                                                                                                                                                  | <b>BASELINE VISIT</b>                                                                                                                   |                                                                                                                                                                                |
|-----------------------------------------------------------------------------------------------------------------------------------------------------------------|-----------------------------------------------------------------------------------------------------------------------------------------|--------------------------------------------------------------------------------------------------------------------------------------------------------------------------------|
| Visit date<br><div style="text-align: center; font-family: monospace; font-size: 1.2em;">             □□/□□/□□□□<br/>             (dd/mm/yyyy)           </div> | Study number<br><div style="text-align: center; font-family: monospace; font-size: 1.2em;">             0902-□□□□□□-□□           </div> | Patient initials<br><div style="text-align: center; font-family: monospace; font-size: 1.2em;">             □□□□<br/>             E.g. <u>Smith</u> John SMJO           </div> |

## PART II – Semen Component

### CENTRAL LABORATORY COLLECTION

|                        |                               |                          |          |
|------------------------|-------------------------------|--------------------------|----------|
| Sample collection date | ____/____/_____<br>dd/mm/yyyy |                          |          |
| Collected              | Yes                           | No                       | Comments |
| Stored Plasma          | <input type="checkbox"/>      | <input type="checkbox"/> | _____    |
| Collected              | Yes                           | No                       | Comments |
| Stored Semen           | <input type="checkbox"/>      | <input type="checkbox"/> | _____    |

### LOCAL LABORATORY COLLECTION

#### STI SCREEN

Sample collection date \_\_\_\_/\_\_\_\_/\_\_\_\_\_  
dd/mm/yyyy

#### Syphilis serology

|                                                  | Reactive | Non-reactive | Not done |     |
|--------------------------------------------------|----------|--------------|----------|-----|
| Syphilis antibody                                |          |              |          |     |
| Confirmatory tests if syphilis antibody reactive |          |              |          |     |
|                                                  | Reactive | Non-reactive | Not done | N/A |
| TPPA                                             |          |              |          |     |
| FTA-ABS                                          |          |              |          |     |
| Non treponemal tests                             |          |              |          |     |
|                                                  | Titre    | Not done     | N/A      |     |
| RPR                                              |          |              |          |     |
| VDRL                                             |          |              |          |     |

| <b>RAMPT-C</b>                                                                                                                                                                                                                                                 | <b>BASELINE VISIT</b>                                                                                                                                                                                                                                        |                                                                                                                                                                                          |
|----------------------------------------------------------------------------------------------------------------------------------------------------------------------------------------------------------------------------------------------------------------|--------------------------------------------------------------------------------------------------------------------------------------------------------------------------------------------------------------------------------------------------------------|------------------------------------------------------------------------------------------------------------------------------------------------------------------------------------------|
| Visit date<br><div style="text-align: center; margin: 5px 0;"> <input type="text"/> <input type="text"/> / <input type="text"/> <input type="text"/> / <input type="text"/> <input type="text"/> <input type="text"/> <input type="text"/> </div> (dd/mm/yyyy) | Study number<br><div style="text-align: center; margin: 5px 0;"> <b>0902-</b><input type="text"/><input type="text"/><input type="text"/><input type="text"/><input type="text"/><input type="text"/><b>-</b><input type="text"/><input type="text"/> </div> | Patient initials<br><div style="text-align: center; margin: 5px 0;"> <input type="text"/><input type="text"/><input type="text"/><input type="text"/> </div> E.g. <u>Smith</u> John SMJO |

**STI SCREEN continued.....**

**Chlamydia urine, throat & rectal swab**

|                           | Detected | Not detected | Not done |
|---------------------------|----------|--------------|----------|
| Chlamydia urine PCR       |          |              |          |
| Chlamydia throat swab PCR |          |              |          |
| Chlamydia rectal swab PCR |          |              |          |

**Lymphogranuloma venereum (LGV) rectal swab – only perform if Chlamydia PCR was detected**

|                     | Detected | Not detected | Not done | N/A |
|---------------------|----------|--------------|----------|-----|
| LGV rectal swab PCR |          |              |          |     |

**Gonorrhoea urine, throat & rectal swab**

|                                                                                               | Detected                                                                                                                 | Not detected | Not done |
|-----------------------------------------------------------------------------------------------|--------------------------------------------------------------------------------------------------------------------------|--------------|----------|
| Gonorrhoea urine PCR                                                                          |                                                                                                                          |              |          |
| Gonorrhoea throat swab PCR                                                                    |                                                                                                                          |              |          |
| Gonorrhoea throat swab Culture<br>(if detected, indicate 1+, 2+, 3+ or 4+ by ticking the box) | <input type="checkbox"/> 1+<br><input type="checkbox"/> 2+<br><input type="checkbox"/> 3+<br><input type="checkbox"/> 4+ |              |          |
| Gonorrhoea rectal swab PCR                                                                    |                                                                                                                          |              |          |
| Gonorrhoea rectal swab Culture<br>(if detected, indicate 1+, 2+, 3+ or 4+ by ticking the box) | <input type="checkbox"/> 1+<br><input type="checkbox"/> 2+<br><input type="checkbox"/> 3+<br><input type="checkbox"/> 4+ |              |          |

**HSV swab – only perform in the presence of an ulcerative lesion**

|               | Detected | Not detected | Not done | N/A |
|---------------|----------|--------------|----------|-----|
| HSV-1 DNA PCR |          |              |          |     |
| HSV-2 DNA PCR |          |              |          |     |

| RAMPT-C                                                                                                                                                                                                   |                                                                                                                                                                                                        | BASELINE VISIT                                                                                                                         |  |
|-----------------------------------------------------------------------------------------------------------------------------------------------------------------------------------------------------------|--------------------------------------------------------------------------------------------------------------------------------------------------------------------------------------------------------|----------------------------------------------------------------------------------------------------------------------------------------|--|
| Visit date<br><input type="text"/> <input type="text"/> / <input type="text"/> <input type="text"/> / <input type="text"/> <input type="text"/> <input type="text"/> <input type="text"/><br>(dd/mm/yyyy) | Study number<br><b>0902-</b> <input type="text"/> <input type="text"/> <input type="text"/> <input type="text"/> <input type="text"/> <input type="text"/> - <input type="text"/> <input type="text"/> | Patient initials<br><input type="text"/> <input type="text"/> <input type="text"/> <input type="text"/><br>E.g. <u>Smith</u> John SMJO |  |

**STI SCREEN continued.....**

**HAV serology**

|                    | Detected | Not detected | Equivocal | Not done |
|--------------------|----------|--------------|-----------|----------|
| HAV total antibody |          |              |           |          |

**End of Part II**

| RAMPT-C                                  | BASELINE VISIT                         |                                                         |
|------------------------------------------|----------------------------------------|---------------------------------------------------------|
| Visit date<br>□□/□□/□□□□<br>(dd/mm/yyyy) | Study number<br><b>0902-</b> □□□□□□-□□ | Patient initials<br>□□□□<br>E.g. <u>Smith</u> John SMJO |

### PART III – Behavioural Interview Component

Has the patient been referred to Dr Garrett Prestage for the Behavioural mechanisms interview?

Referral date \_\_\_/\_\_\_/\_\_\_\_\_  
                                   dd/mm/yyyy

**End of Part III**
