# Supplementary material for: Venue-Based Networks May Underpin HCV Transmissions amongst HIV-Infected Gay and Bisexual Men
Source: PubMed Central journal article supplement (PMC5008823; doi:10.1371/journal.pone.0162002), 2016-09-01
Supplement: pone.0162002.s004.pdf [file pone.0162002.s004.pdf]

#### **S4 Generation of NS5B amplicons**

Forward (positions 8250-8275) and reverse primers (8616-8638) were used as described previously (Murphy et al 2007). Final PCR reactions contained one times concentration HI-FI buffer, 0.02 unit/ $\mu$ L of Velocity Taq Polymerase, 250  $\mu$ M dNTP (Bioline), 200nM forward primer (Integrated DNA Technologies), 400nM reverse primer, one times concentration of Polymate (Bioline) and cDNA at 1/10 of the final reaction volume. PCRs were performed in a total volume of 50  $\mu$ L. Thermocycling conditions are described in the table below. PCR products were stored at -20°C until required.

#### **Thermocycling conditions for generation of NS5B amplicons**

|                  |              |
|------------------|--------------|
| <b>1 cycle</b>   | 98°C 2 mins  |
| <b>40 cycles</b> | 98°C 30 secs |
|                  | 56°C 30 secs |
|                  | 72°C 1 min   |
| <b>1 cycle</b>   | 72°C 10 mins |
| <b>Hold</b>      | 4°C          |
