# Supplementary material for: Venue-Based Networks May Underpin HCV Transmissions amongst HIV-Infected Gay and Bisexual Men
Source: PubMed Central journal article supplement (PMC5008823; doi:10.1371/journal.pone.0162002), 2016-09-01
Supplement: pone.0162002.s005.pdf [file pone.0162002.s005.pdf]

**Supplementary S1 Table. Histories of injection drug use and sexual behaviour for ten men with discordance between clinician and participant-assigned mode of HCV acquisition.**

| Study ID      | Last time injected         | Number of episodes of IDU in previous six months | New needle used in past month | Last ever injected drug | Most frequently injected drug | All sexual partners in ≤ 6 months | URAI, no. of partners in ≤ 6 months | UIAI, no. of partners in ≤ 6 months |
|---------------|----------------------------|--------------------------------------------------|-------------------------------|-------------------------|-------------------------------|-----------------------------------|-------------------------------------|-------------------------------------|
| M1            | Within the last month      | 60                                               | Always                        | Methamphetamine         | Methamphetamine               | 30                                | 30                                  | 30                                  |
| M7            | Between 1 and 6 months ago | 8                                                | NA                            | Methamphetamine         | Methamphetamine               | 23                                | 15                                  | 0                                   |
| M11           | Between 1 and 6 months ago | 6                                                | NA                            | Methamphetamine         | Methamphetamine               | 30                                | 5                                   | 5                                   |
| S5            | Between 1 and 6 months ago | 4*                                               | NA                            | Methamphetamine         | Methamphetamine               | 34                                | 15                                  | 15                                  |
| S19           | Between 1 and 6 months ago | 1*                                               | NA                            | Methamphetamine         | Methamphetamine               | 10                                | 11                                  | 10                                  |
| S20           | Within the last month      | 6                                                | Always                        | Methamphetamine         | Methamphetamine               | 10                                | 10                                  | 10                                  |
| S21           | Within the last month      | 6                                                | Always                        | Methamphetamine         | Methamphetamine               | NA                                | NA                                  | NA                                  |
| S23           | Between 1 and 6 months ago | 3*                                               | NA                            | Buprenorphine           | Buprenorphine                 | 8                                 | 0                                   | 3                                   |
| S25           | Within the last month      | 6                                                | Always                        | Methamphetamine         | Methamphetamine               | NA                                | NA                                  | NA                                  |
| S26           | Within the last month      | 70                                               | Always                        | Methamphetamine         | Methamphetamine               | 85                                | 85                                  | 0                                   |
| <b>Median</b> | <b>x</b>                   | <b>6 (4-21)</b>                                  | <b>x</b>                      | <b>x</b>                | <b>x</b>                      | <b>27 (10-33)</b>                 | <b>13 (6-26)</b>                    | <b>8 (1-14)</b>                     |

\* lifetime use of IDU

NA denotes data not available.
