# Supplementary material for: Venue-Based Networks May Underpin HCV Transmissions amongst HIV-Infected Gay and Bisexual Men
Source: PubMed Central journal article supplement (PMC5008823; doi:10.1371/journal.pone.0162002), 2016-09-01
Supplement: pone.0162002.s006.pdf [file pone.0162002.s006.pdf]

**Supplementary S2 Table. Association between 1-mode social networks and phylogenetic clustering according to different genetic distance thresholds.**

| <b>Participant group</b> | <b>Jaccard similarity coefficient</b> | <b>Mean</b> | <b>SD</b> | <b>Min</b> | <b>Max</b> | <b>p-value</b> |
|--------------------------|---------------------------------------|-------------|-----------|------------|------------|----------------|
| Melbourne<br>p>0.03      | 0.158                                 | 0.133       | 0.029     | 0.100      | 0.158      | 0.573          |
| Melbourne<br>p<=0.03     | 0.167                                 | 0.103       | 0.034     | 0.050      | 0.167      | 0.146          |
| Sydney                   | 0.100                                 | 0.045       | 0.045     | 0.000      | 0.222      | 0.168          |
| All<br>p>0.03            | 0.128                                 | 0.033       | 0.025     | 0.000      | 0.158      | 0.005          |
| All<br>p<=0.03           | 0.132                                 | 0.029       | 0.025     | 0.000      | 0.162      | 0.004          |
